# Supplementary material
Source: publisher figshare collection journal article supplement (https://gsajournals.figshare.com/articles/dataset/_/7096346)
Supplement: Supplementary file 2 [file 1]

1 **Supplementary Tables**

2 **Table S1.** Regression of the first ten principal components **derived from Methylation** on age at diagnosis, race and gender.

| PC <sup>1</sup> | Age                   |                      |                        | Race     |         |           | Gender   |         |           |
|-----------------|-----------------------|----------------------|------------------------|----------|---------|-----------|----------|---------|-----------|
|                 | Estimate <sup>2</sup> | p-value <sup>3</sup> | Prop. var <sup>4</sup> | Estimate | p-value | Prop. var | Estimate | p-value | Prop. var |
| <b>PC1</b>      | 1.2980                | -0.9303              | 0.0001                 | 0.1728   | 0.4808  | 0.0025    | 0.5522   | 0.2621  | 0.0062    |
| <b>PC2</b>      | -17.477               | 0.2378               | 0.0069                 | 0.2919   | 0.2331  | 0.0069    | 0.4406   | 0.3709  | 0.0039    |
| <b>PC3</b>      | 10.843                | 0.4644               | 0.0026                 | -0.1728  | 0.4808  | 0.0025    | 0.4669   | 0.3429  | 0.0044    |
| <b>PC4</b>      | 81.307                | < 0.0001             | 0.1479                 | -0.0869  | 0.7234  | 0.0006    | 0.0096   | 0.9845  | 0.0001    |
| <b>PC5</b>      | 10.164                | 0.4928               | 0.0023                 | 0.0137   | 0.9554  | 0.0001    | 0.8281   | 0.0918  | 0.0139    |
| <b>PC6</b>      | -22.482               | 0.1285               | 0.0113                 | 0.5794   | 0.0174  | 0.0276    | -0.7314  | 0.1369  | 0.0109    |
| <b>PC7</b>      | -25.149               | 0.0888               | 0.0142                 | 0.5405   | 0.0266  | 0.0239    | -0.2582  | 0.6003  | 0.0014    |
| <b>PC8</b>      | 25.342                | 0.0864               | 0.0144                 | 0.6912   | 0.0044  | 0.0392    | -0.4463  | 0.3649  | 0.0040    |
| <b>PC9</b>      | -9.0396               | 0.5419               | 0.0018                 | -0.0180  | 0.9414  | 0.0001    | 0.4173   | 0.3969  | 0.0035    |
| <b>PC10</b>     | -38.245               | 0.0094               | 0.0328                 | -0.1458  | 0.5522  | 0.0017    | 0.5321   | 0.2801  | 0.0057    |

3 <sup>1</sup>Principal components derived from methylation; <sup>2</sup>Coefficient estimate associated with each PC; <sup>3</sup>p-value for significance of  
4 association; <sup>4</sup>Proportion of variance of age at diagnosis, race and gender explained by each methylation-derived principal component.

5

6 **Table S2.** Regression of the first ten principal components **derived from CNV** on age at diagnosis, race and gender.

| PC <sup>1</sup> | Age                   |                      |                        | Race     |         |           | Gender   |         |           |
|-----------------|-----------------------|----------------------|------------------------|----------|---------|-----------|----------|---------|-----------|
|                 | Estimate <sup>2</sup> | p-value <sup>3</sup> | Prop. var <sup>4</sup> | Estimate | p-value | Prop. var | Estimate | p-value | Prop. var |
| <b>PC1</b>      | -0.0007               | < 0.0001             | 0.0528                 | 0.2174   | 0.3676  | 0.0019    | -0.2642  | 0.5891  | 0.0007    |
| <b>PC2</b>      | -0.0004               | 0.0177               | 0.0134                 | 0.2447   | 0.3106  | 0.0025    | 0.3453   | 0.4800  | 0.0012    |
| <b>PC3</b>      | 0.0007                | < 0.0001             | 0.0458                 | -0.2403  | 0.3193  | 0.0024    | 0.1464   | 0.7648  | 0.0002    |
| <b>PC4</b>      | -0.0001               | 0.6884               | 0.0004                 | -0.1344  | 0.5776  | 0.0007    | 1.1161   | 0.0221  | 0.0124    |
| <b>PC5</b>      | 0.0005                | 0.0047               | 0.0189                 | -0.4950  | 0.0398  | 0.0101    | -0.1575  | 0.7475  | 0.0003    |
| <b>PC6</b>      | 0.0001                | 0.7829               | 0.0002                 | -0.2369  | 0.3262  | 0.0023    | 0.1383   | 0.7374  | 0.0002    |
| <b>PC7</b>      | -0.0004               | 0.0141               | 0.0143                 | 0.5030   | 0.0367  | 0.0104    | -0.1363  | 0.7806  | 0.0002    |
| <b>PC8</b>      | -0.0002               | 0.2216               | 0.0036                 | 0.3979   | 0.0988  | 0.0065    | -0.0020  | 0.9967  | < 0.0001  |
| <b>PC9</b>      | 0.0002                | 0.1691               | 0.0045                 | -0.3202  | 0.1843  | 0.0042    | -0.4902  | 0.3159  | 0.0024    |
| <b>PC10</b>     | 0.0002                | 0.1428               | 0.0051                 | 0.1766   | 0.4643  | 0.0013    | -0.5352  | 0.2735  | 0.0029    |

7 <sup>1</sup>Principal components derived from CNV; <sup>2</sup>Coefficient estimate associated with each PC; <sup>3</sup>p-value for significance of association;

8 <sup>4</sup>Proportion of variance of age at diagnosis, race and gender explained by each CNV-derived principal component.

9

10

11 **Table S3.** Regression of the first ten principal components **derived from SNP** on age at diagnosis, race and gender.

| PC <sup>1</sup> | Age                   |                      |                        | Race     |         |           | Gender   |         |           |
|-----------------|-----------------------|----------------------|------------------------|----------|---------|-----------|----------|---------|-----------|
|                 | Estimate <sup>2</sup> | p-value <sup>3</sup> | Prop. var <sup>4</sup> | Estimate | p-value | Prop. var | Estimate | p-value | Prop. var |
| <b>PC1</b>      | -0.0003               | 0.4076               | 0.0033                 | 3.3334   | <0.0001 | 0.9129    | 0.2322   | 0.6376  | 0.0011    |
| <b>PC2</b>      | 0.0003                | 0.3118               | 0.0050                 | -0.4629  | 0.0578  | 0.0176    | -0.1743  | 0.7236  | 0.0001    |
| <b>PC3</b>      | 0.0002                | 0.6533               | 0.0010                 | 0.4331   | 0.0785  | 0.0151    | 0.7273   | 0.1421  | 0.0105    |
| <b>PC4</b>      | -0.0007               | 0.0330               | 0.0222                 | -0.1229  | 0.6159  | 0.0012    | -0.5370  | 0.2752  | 0.0059    |
| <b>PC5</b>      | 0.0001                | 0.8394               | 0.0002                 | 0.0001   | 0.9999  | 0.0001    | 0.3934   | 0.4245  | 0.0031    |
| <b>PC6</b>      | -0.0003               | 0.3870               | 0.0037                 | 0.0147   | 0.9522  | 0.0001    | -0.2112  | 0.6683  | 0.0009    |
| <b>PC7</b>      | 0.0001                | 0.8230               | 0.0002                 | 0.2698   | 0.2705  | 0.0059    | 0.8434   | 0.0859  | 0.0145    |
| <b>PC8</b>      | -0.0003               | 0.4512               | 0.0028                 | -0.1576  | 0.5203  | 0.0021    | 0.3648   | 0.4589  | 0.0027    |
| <b>PC9</b>      | 0.0006                | 0.0722               | 0.0158                 | 0.1999   | 0.4146  | 0.0033    | -0.1339  | 0.7859  | 0.0004    |
| <b>PC10</b>     | 0.0003                | 0.4352               | 0.0030                 | 0.1527   | 0.5332  | 0.0019    | -0.3525  | 0.4743  | 0.0025    |

12 <sup>1</sup>Principal components derived from SNP; <sup>2</sup>Coefficient estimate associated with each PC; <sup>3</sup>*p*-value for significance of association;

13 <sup>4</sup>Proportion of variance of age at diagnosis, race and gender explained by each SNP-derived principal component.

14

15

16 **Table S4.** Regression of the first ten principal components **derived from gene expression** on age at diagnosis, race and gender.

| PC <sup>1</sup> | Age                   |                      |                        | Race     |         |           | Gender   |         |           |
|-----------------|-----------------------|----------------------|------------------------|----------|---------|-----------|----------|---------|-----------|
|                 | Estimate <sup>2</sup> | p-value <sup>3</sup> | Prop. Var <sup>4</sup> | Estimate | p-value | Prop. var | Estimate | p-value | Prop. var |
| <b>PC1</b>      | -11.646               | 0.4319               | 0.0031                 | -0.1489  | 0.5439  | 0.0018    | -0.6582  | 0.1808  | 0.0088    |
| <b>PC2</b>      | 7.4834                | 0.6137               | 0.0013                 | 0.1073   | 0.6617  | 0.0009    | -0.4501  | 0.3608  | 0.0041    |
| <b>PC3</b>      | -3.8613               | 0.7946               | 0.0003                 | -0.5408  | 0.0265  | 0.0241    | 1.5081   | 0.0019  | 0.0462    |
| <b>PC4</b>      | 30.817                | 0.0367               | 0.0213                 | -0.3723  | 0.1278  | 0.0114    | -0.3094  | 0.5301  | 0.0019    |
| <b>PC5</b>      | 9.1784                | 0.5359               | 0.0018                 | -0.2891  | 0.2379  | 0.0069    | 0.6782   | 0.1680  | 0.0093    |
| <b>PC6</b>      | 18.392                | 0.2139               | 0.0076                 | -0.4619  | 0.0585  | 0.0175    | 0.2511   | 0.6104  | 0.0013    |
| <b>PC7</b>      | -29.571               | 0.0452               | 0.0196                 | 0.4525   | 0.0639  | 0.0168    | 0.8961   | 0.0680  | 0.0163    |
| <b>PC8</b>      | 20.642                | 0.1629               | 0.0096                 | -0.0853  | 0.7278  | 0.0006    | -0.0749  | 0.8791  | 0.0001    |
| <b>PC9</b>      | -65.807               | < 0.0001             | 0.0972                 | -0.3510  | 0.1514  | 0.0101    | -1.3815  | 0.0047  | 0.0388    |
| <b>PC10</b>     | 17.264                | 0.2435               | 0.0067                 | -0.1708  | 0.4857  | 0.0024    | 0.3609   | 0.4637  | 0.0026    |

17 <sup>1</sup>Principal components derived from gene expression; <sup>2</sup>Coefficient estimate associated with each PC; <sup>3</sup>*p*-value for significance of  
18 association; <sup>4</sup>Proportion of variance of age at diagnosis, race and gender explained by each gene expression-derived principal  
19 component.

**Table S5.** Hazard ratio, confidence interval (95%) and p-value for clinical, demographic and chemotherapy treatments in GBM patients.

| <b>Covariate<sup>1</sup></b>                    | <b>Hazard ratio (95% CI)<sup>2</sup></b> | <b>Pr(&gt; z )<sup>3</sup></b> |
|-------------------------------------------------|------------------------------------------|--------------------------------|
| <b>Age at diagnosis</b>                         | 1.027 (1.019,1.034)                      | < 0.0001                       |
| <b>Gender (Males)</b>                           | 0.986 (0.794,1.224)                      | 0.8980                         |
| <b>Race (European-American)</b>                 | 1.019 (0.634,1.640)                      | 0.9362                         |
| <b>Method of diagnosis (Tumor resection)</b>    | 0.822 (0.574,1.178)                      | 0.2859                         |
| <b>Tumor purity</b>                             | 0.405 (0.163,1.008)                      | 0.0539                         |
| <b>Radiation</b>                                | 0.864 (0.649,1.149)                      | 0.3145                         |
| <b>Chemotherapy treatments (compound names)</b> |                                          |                                |
| <b>Temozolomide</b>                             | 0.651 (0.515,0.822)                      | 0.0003                         |
| <b>Bevacizumab</b>                              | 0.758 (0.516,1.113)                      | 0.1571                         |
| <b>Carboplatin</b>                              | 0.938 (0.583,1.508)                      | 0.7920                         |
| <b>Carmustine</b>                               | 0.778 (0.557,1.069)                      | 0.1218                         |
| <b>Erlotinib</b>                                | 1.200 (0.713,2.022)                      | 0.4923                         |
| <b>Etoposide</b>                                | 0.903 (0.539,1.514)                      | 0.7001                         |
| <b>Irinotecan</b>                               | 0.694 (0.445,1.084)                      | 0.1088                         |
| <b>Lomustine</b>                                | 0.587 (0.389,0.885)                      | 0.0109                         |
| <b>Procarbazine</b>                             | 1.046 (0.594,1.843)                      | 0.8756                         |
| <b>Tamoxifen</b>                                | 1.362 (0.763,2.432)                      | 0.2966                         |
| <b>Other Chemo</b>                              | 0.836 (0.612,1.141)                      | 0.2591                         |

<sup>1</sup> Clinical covariates included in the model; <sup>2</sup>Hazard ratio and corresponding 95% confidence interval; <sup>3</sup>p-value for significance of the covariate.
